# Supplementary material
Source: MDPI journal article supplement (https://www.mdpi.com/2073-4352/5/4/534)
Supplement: s1 [file s1]

Supplementary Information

## Physiochemical Characterization of Iodine (V) Oxide Part II: Morphology and Crystal Structure of Particulate Films

Brian K. Little <sup>1,\*</sup>, Samuel B. Emery <sup>2</sup> and C. Michael Lindsay <sup>3</sup>

<sup>1</sup> University of Dayton Research Institute, U.S. Air Force Research Laboratory, Eglin AFB, FL 32542, USA

<sup>2</sup> Naval Surface Warfare Center Indian Head Explosive Ordnance Technology Division, Indian Head, MD 20640, USA; E-Mail: samuel.emery@navy.mil

<sup>3</sup> U.S. Air Force Research Laboratory, Energetic Materials Branch, Eglin AFB, FL 32542, USA; E-Mail: c.lindsay@us.af.mil

\* Author to whom correspondence should be addressed; E-Mail: brian.little.14.ctr@us.af.mil; Tel.: +1-850-882-8968; Fax: +1-850-882-3540.

- (1) The first supplementary figure contains images of pre and post sonicated suspensions of  $\text{HI}_3\text{O}_8$  and their observed discoloration due to the presence of  $\text{I}_2$ .
- (2) The second supplementary figure is a collection of optical microscopy images for crystals of various shapes.
- (3) The third supplementary figure illustrates the deposition quality between drop cast and spun cast  $\text{HI}_3\text{O}_8$  particles onto glass substrates.
- (4) The fourth supplementary figure contains images of spun cast films at three different spin rates.

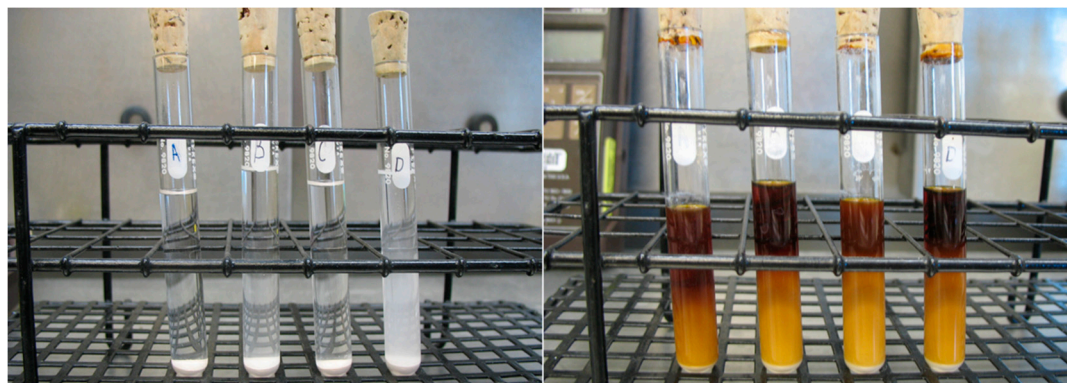

**Figure S1.** (Bottom left) Presonicated suspensions of  $\text{HI}_3\text{O}_8$  powder in (a) denatured ethanol; (b) 200 proof ethanol; (c) 200 proof ethanol: acetone; and (d) 200 proof ethanol: methanol. (bottom right) post sonicated suspensions after 24–48 h at 30 °C.

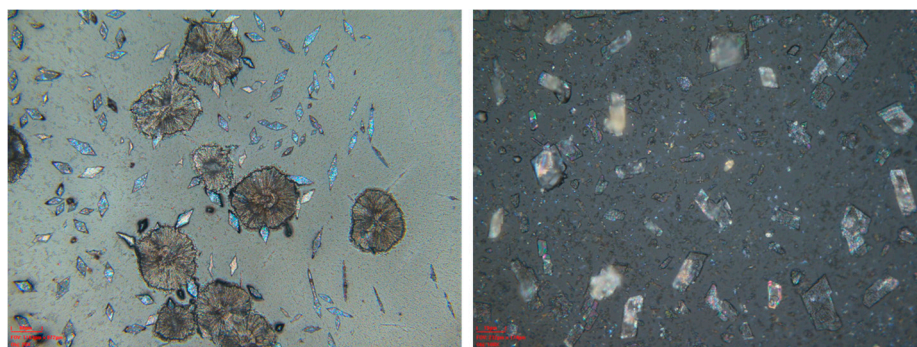

**Figure S2.** Microscopy images of preliminary drop or spin cast films at 40% relative humidity or higher from an ethanol or 1:1 blend of ethanol with ketones/acetates/methanol. Rhombohedral shaped crystals (**bottom left**) and plate shaped crystals (**bottom right**).

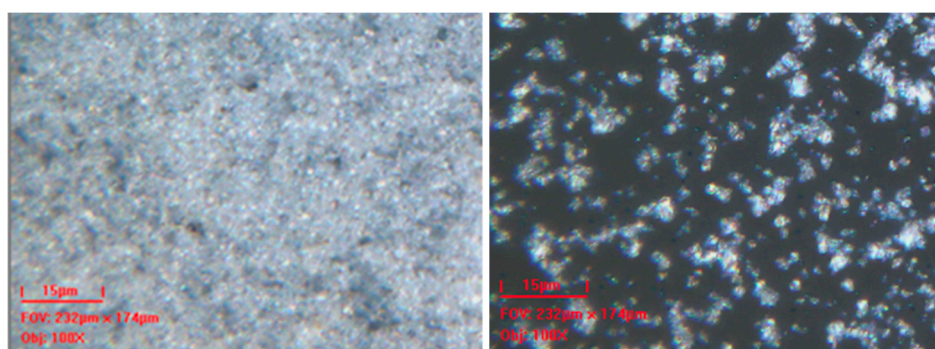

**Figure S3.** Optical microscopy images of preliminary drop cast (**bottom left**) and spin coated (**bottom right**) films at 2% RH from a 200 proof ethanol sonicated suspensions of  $\text{HI}_3\text{O}_8$  particles. Film spin coated at 1000 rpm.

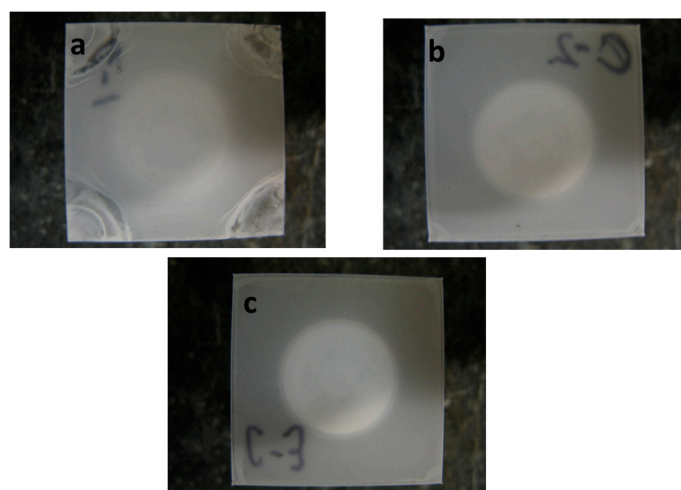

**Figure S4.** Images of spun cast films deposited onto glass substrates at (a) 500 rpm; (b) 1500 rpm; and (c) 2500 rpm. Shaded circle area in the center is the support stub for the substrate.
